# Supplementary material for: Fullerene–porphyrin hybrid nanoparticles that generate activated oxygen by photoirradiation
Source: Royal Society of Chemistry journal article supplement (doi:10.1039/d0ra09387d), 2021-01-01
Supplement: d0ra09387d1.pdf [file d0ra09387d1.pdf]

Electronic Supplementary Information

Fullerene-Porphyrin Hybrid Nanoparticles that Generate Activated Oxygen by  
Photoirradiation

Kouta Sugikawa\*, Kosuke Masuda, Kentaro Kozawa, Riku Kawasaki and Atsushi Ikeda\*

Applied Chemistry Program, Graduate School of Advanced Science and Engineering, Hiroshima University,  
Higashi-Hiroshima 739-8527, Japan

## MATERIALS AND METHODS

### Materials

$\gamma$ -Cyclodextrin ( $\gamma$ -CD), trimethyl- $\beta$ -cyclodextrin (TMe- $\beta$ -CD), and tetraphenylporphyrin (**1**) were purchased from Wako Pure Chemical Industries, Ltd. (Tokyo, Japan). Poly(ethylene glycol) monomethyl ether (PEG,  $M_w = 2,000$ ) and 5,10,15,20-tetrakis(4-carboxyphenyl)porphyrin (**5**) were purchased from Sigma-Aldrich Inc. (St. Louis, MO). Zinc tetraphenylporphyrin (**1**), 5,10,15,20-tetrakis(4-hydroxyphenyl)porphyrin (**4**), and 5,10,15,20-tetrakis(4-aminophenyl)porphyrin (**6**) were purchased from Tokyo Chemical Industry Co., Ltd. (Tokyo, Japan). Fullerene  $C_{60}$  (>99.5%) was acquired from MER Co. (Tucson, AZ). 5,10,15,20-Tetrakis(4-methoxyphenyl)porphyrin (**3**) was synthesized, as previously reported.<sup>1</sup>

### Preparation of the $C_{60}$ - $\gamma$ -CD complex<sup>1</sup>

$C_{60}$  (5.0 mg,  $6.9 \times 10^{-6}$  mol) and  $\gamma$ -CD (36.0 mg,  $2.8 \times 10^{-5}$  mol) were placed in an agate capsule containing two agate mixing balls. The mixture was mixed vigorously at 30 Hz for 20 min using a high-speed vibration mill (MM 200; Retsch Co., Ltd., Haan, Germany). The solid mixture was suspended in deionized water or deuterium oxide (1.5 mL) to produce a black emulsion. After centrifugation (14,000 rpm, 20 min), the non-dispersed  $C_{60}$  was removed from the solution. The concentration of  $C_{60}$  in the  $C_{60}$ - $\gamma$ -CD complex was determined by measuring the absorbance of the solution at 332 nm (the molar extinction coefficient for the water-soluble  $C_{60}$ - $\gamma$ -CD complex is  $\epsilon_{332} = 4.27 \times 10^4$  dm<sup>3</sup> mol<sup>-1</sup> cm<sup>-1</sup>).

### Preparation of the porphyrin (por)-TMe- $\beta$ -CD complex<sup>2</sup>

Following the same procedure as that used to prepare the  $C_{60}$ - $\gamma$ -CD complex, the por-TMe- $\beta$ -CD complexes were obtained by complexation of **1**, **2**, **3**, **4**, **5**, or **6** (5.1 mg) with TMe- $\beta$ -CD (23.3 mg,  $1.6 \times 10^{-6}$  mol) in water (1.5 mL). The concentration of each porphyrin in the corresponding por-TMe- $\beta$ -CD complex was determined by measuring the absorbance of the solution at each absorption maximum (the molar extinction coefficients for **1**-, **2**-, **3**-, **4**-, **5**-, and **6**-TMe- $\beta$ -CD complexes are:  $\epsilon_{415} = 3.30 \times 10^5$  dm<sup>3</sup> mol<sup>-1</sup> cm<sup>-1</sup>,  $\epsilon_{415} = 1.81 \times 10^5$  dm<sup>3</sup> mol<sup>-1</sup> cm<sup>-1</sup>,  $\epsilon_{418} = 3.49 \times 10^5$  dm<sup>3</sup> mol<sup>-1</sup> cm<sup>-1</sup>,  $\epsilon_{419} = 3.25 \times 10^5$  dm<sup>3</sup> mol<sup>-1</sup> cm<sup>-1</sup>,  $\epsilon_{418} = 3.77 \times 10^5$  dm<sup>3</sup> mol<sup>-1</sup> cm<sup>-1</sup>, and  $\epsilon_{425} = 2.70 \times 10^5$  dm<sup>3</sup> mol<sup>-1</sup> cm<sup>-1</sup>, respectively).

### Preparation of water-dispersible $C_{60}$ -nanoparticles (NPs) by the guest exchange method

An aqueous solution of the  $C_{60}$ - $\gamma$ -CD complex (0.2 mL,  $[C_{60}] = 1.0$  mM) and an aqueous solution of PEG (0.2 mL, 50 g/L), and water (1.6 mL) were mixed and heated at 80 °C for 1 h in a glass vial.

### Preparation of water-dispersible C<sub>60</sub>-por NP by the guest exchange method

Typically, an aqueous solution of the C<sub>60</sub>- $\gamma$ -CD complex (0.2 mL, [C<sub>60</sub>] = 1.0 mM), an aqueous solution of the 1-TMe- $\beta$ -CD complex (0.2 mL, [1] = 1.0 mM), an aqueous solution of PEG (0.2 mL, 50 g/L), and water (1.4 mL) were mixed and stirred at 80 °C for 1 h in a 5-mL glass vial.

### Characterization of *n*C<sub>60</sub> and C<sub>60</sub>-por NP

Light absorption by aqueous dispersions of *n*C<sub>60</sub> or *n*C<sub>60</sub>-por was measured using a ultraviolet-visible (UV/Vis) spectrophotometer (UV-3600, Shimadzu, Kyoto, Japan). Particle morphology and size were characterized using transmission electron microscopy (TEM; JEM-1400, JEOL Ltd., Tokyo, Japan). 100 NPs were counted to calculate the average diameter of the NPs from the TEM micrographs. High-resolution TEM (HRTEM) images were obtained using a JEM-2010 microscope (JEOL Ltd., Tokyo, Japan). Lattice fringe spacing was determined from HRTEM micrographs analysis using ImageJ software by averaging at least 100 measurements.  $\zeta$ -potential and additional size measurements were performed by dynamic light scattering using a Zetasizer Nano ZS analyzer (Malvern Instruments Ltd., Worcestershire, UK) equipped with a He-Ne laser operating at 633 nm and 4 mW.

### <sup>1</sup>H NMR spectroscopy

<sup>1</sup>H NMR and <sup>13</sup>C NMR data were recorded using a 400-MHz Varian 400-MR spectrometer. Chemical shifts ( $\delta$ ) are expressed in parts per million (ppm) relative to the peak assigned to water ( $d = 4.8$  ppm) and dimethyl sulfoxide-d<sub>6</sub> ( $d = 39.5$  ppm).

### References

- (1) A. Ikeda, S. Satake, T. Mae, M. Ueda, K. Sugikawa, H. Shigeto, H. Funabashi, A. Kuroda, *ACS Med. Chem. Lett.*, **2017**, 8, 555.
- (2) A. Ikeda, T. Sato, K. Kitamura, K. Nishiguchi, T. Sasaki, J. Kikuchi, T. Ogawa, K. Yogo and T. Takeya, *Org. Biomol. Chem.*, **2005**, 3, 2907.

## FIGURES

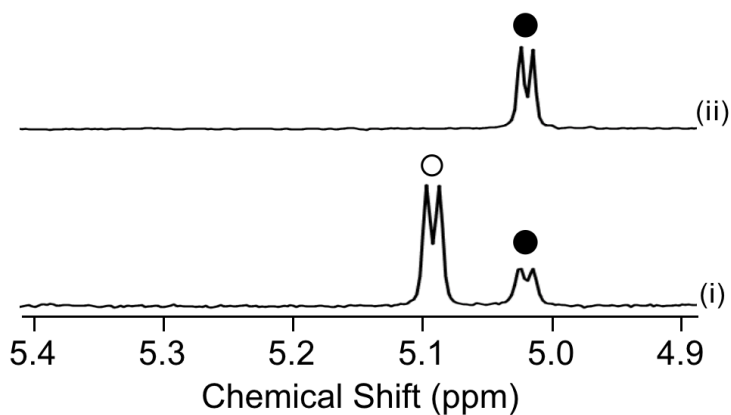

**Fig. S1**  $^1\text{H}$  NMR spectra of fullerene- $\gamma$ -cyclodextrin ( $\text{C}_{60}$ - $\gamma$ -CD) complex aqueous solutions (i) before and (ii) after incubation for 1 h at 80  $^\circ\text{C}$ , with PEG. ( $[\text{C}_{60}] = 0.1 \text{ mM}$ ,  $[\text{PEG}] = 5 \text{ g/L}$ ). Open circles: free  $\gamma$ -CD and filled circles:  $\text{C}_{60}$ - $\gamma$ -CD complex.

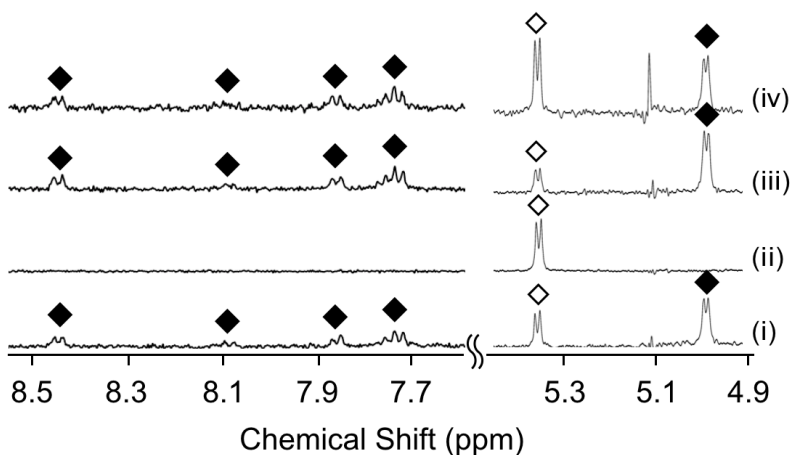

**Fig. S2**  $^1\text{H}$  NMR spectra of aqueous solutions of the **1**-trimethyl- $\beta$ -cyclodextrin (TMe- $\beta$ -CD) complex after incubation for 1 h, at (i) room temperature with poly(ethylene glycol) monomethyl ether (PEG), (ii) 80  $^\circ\text{C}$  with PEG, (iii) room temperature without PEG, and (iv) 80  $^\circ\text{C}$  without PEG ( $[\mathbf{1}] = 0.1 \text{ mM}$ ,  $[\text{PEG}] = 0 \text{ or } 5 \text{ g/L}$ ). Open diamonds: free TMe- $\beta$ -CD and filled diamonds: **1**-TMe- $\beta$ -CD complex.

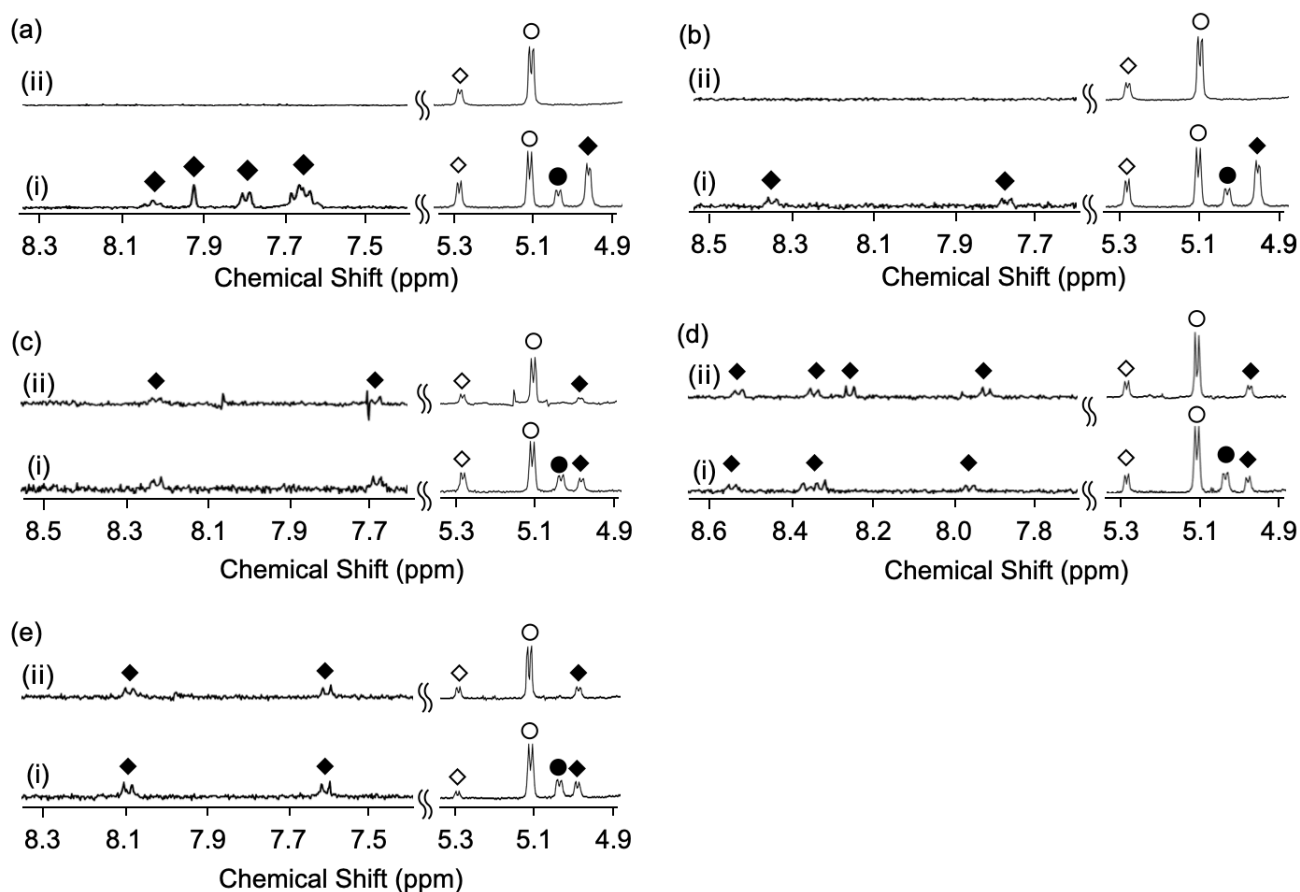

**Fig. S3**  $^1\text{H}$  NMR spectra of mixed solutions comprising  $\text{C}_{60}\text{-}\gamma\text{-CD}$  and (a) **2**-TMe- $\beta\text{-CD}$ , (b) **3**-TMe- $\beta\text{-CD}$ , (c) **4**-TMe- $\beta\text{-CD}$ , (d) **5**-TMe- $\beta\text{-CD}$ , and (e) **6**-TMe- $\beta\text{-CD}$  complexes ( $[\text{C}_{60}] = [\mathbf{2}, \mathbf{3}, \mathbf{4}, \mathbf{5}, \text{or } \mathbf{6}] = 0.1 \text{ mM}$ ) with PEG (5 g/L) (i) before and (ii) after heating at  $80 \text{ }^\circ\text{C}$  for 1 h. Open circles: free  $\gamma\text{-CD}$ , filled circles:  $\text{C}_{60}\text{-}\gamma\text{-CD}$ , open diamonds: free TMe- $\beta\text{-CD}$ , and filled diamonds: porphyrin-TMe- $\beta\text{-CD}$  complex. The spectra between 7.6–8.5 ppm are amplified five-fold.

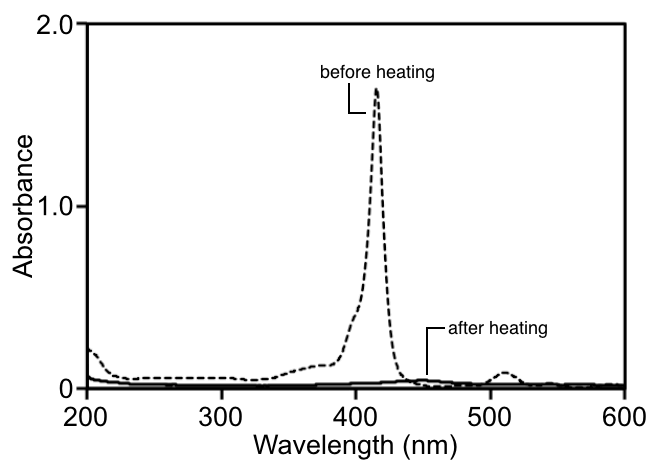

**Fig. S4** (a) Ultraviolet-visible (UV/Vis) absorption spectra of 1-TMe-β-CD before (dashed line) and after (solid line) incubation for 1 h at 80 °C, in the absence of C<sub>60</sub>-γ-CD. [1] = 0.1 mM, [PEG] = 5.0 g/L.

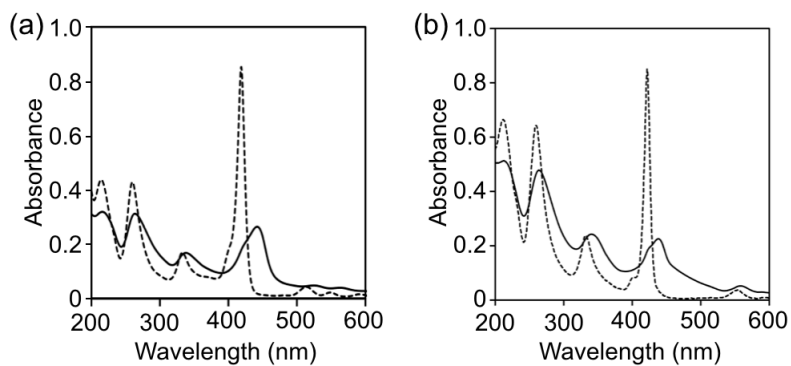

**Fig. S5** UV/Vis absorption spectra of the mixed solution comprising C<sub>60</sub>-γ-CD and (a) 2- or (b) 3-TMe-β-CD complexes ([C<sub>60</sub>] = [2 or 3] = 0.1 mM), respectively, with PEG (5 g/L) before (dashed line) and after (solid line) heating at 80 °C for 1 h.

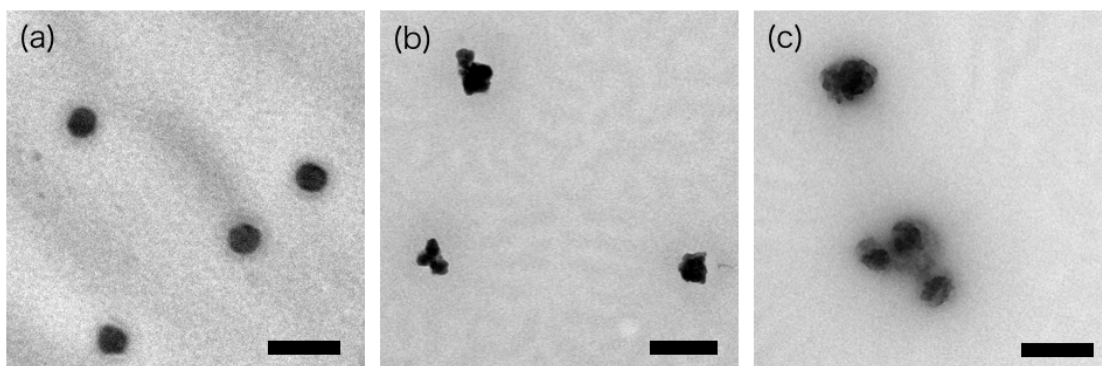

**Fig. S6** Low-magnification transmission electron microscopy images of (a)  $nC_{60}$  and  $nC_{60}$ -**1** prepared with (b) 0.05 mM and (c) 0.1 mM of the **1**-TMe- $\beta$ -CD complex. Scale bars represent 200 nm.
